# Supplementary material for: What is the evidence for the impact of gardens and gardening on health and well-being: a scoping review and evidence-based logic model to guide healthcare strategy decision making on the use of gardening approaches as a social prescription
Source: PubMed Central journal article supplement — BMJ Open. 2020 Jul 19;10(7):e036923. doi: 10.1136/bmjopen-2020-036923 (PMC7371129; doi:10.1136/bmjopen-2020-036923), 2020-07-19
Supplement: bmjopen-2020-036923supp001.pdf [file bmjopen-2020-036923supp001.pdf]

## Appendix 1

**SAMPLE SEARCH STRATEGY****Medline**

Database: Ovid MEDLINE(R) 1946 to Present with Daily Update

Search Strategy:

- 
- 1 Gardens/ (29)
  - 2 Gardening/ (745)
  - 3 Horticultural Therapy/ (32)
  - 4 Parks, Recreational/ (311)
  - 5 "Conservation of Natural Resources"/ (33544)
  - 6 Nature/ (755)
  - 7 garden\*.mp. [mp=title, abstract, original title, name of substance word, subject heading word, keyword heading word, protocol supplementary concept word, rare disease supplementary concept word, unique identifier, synonyms] (8344)
  - 8 horticultur\*.mp. [mp=title, abstract, original title, name of substance word, subject heading word, keyword heading word, protocol supplementary concept word, rare disease supplementary concept word, unique identifier, synonyms] (1641)
  - 9 green care.mp. [mp=title, abstract, original title, name of substance word, subject heading word, keyword heading word, protocol supplementary concept word, rare disease supplementary concept word, unique identifier, synonyms] (21)
  - 10 social prescrib\*.mp. [mp=title, abstract, original title, name of substance word, subject heading word, keyword heading word, protocol supplementary concept word, rare disease supplementary concept word, unique identifier, synonyms] (17)
  - 11 (green space\* or greenspace\*).mp. [mp=title, abstract, original title, name of substance word, subject heading word, keyword heading word, protocol supplementary concept word, rare disease supplementary concept word, unique identifier, synonyms] (509)
  - 12 allotment\*.mp. [mp=title, abstract, original title, name of substance word, subject heading word, keyword heading word, protocol supplementary concept word, rare disease supplementary concept word, unique identifier, synonyms] (448)
  - 13 ecotherap\*.mp. [mp=title, abstract, original title, name of substance word, subject heading word, keyword heading word, protocol supplementary concept word, rare disease supplementary concept word, unique identifier, synonyms] (4)
  - 14 (plant\* adj5 (garden\* or shrub\* or tree\* or flower\* or seed\* or vegetable\* or grass\* or landscap\* or lawn\* or fruit\* or cultivat\*)).mp. [mp=title, abstract, original title, name of substance word, subject heading word, keyword heading word, protocol supplementary concept word, rare disease supplementary concept word, unique identifier, synonyms] (11776)
  - 15 or/1-14 (56079)
  - 16 Treatment Outcome/ (814853)
  - 17 "Outcome Assessment (Health Care)"/ (61518)

- 18 "Outcome and Process Assessment (Health Care)"/ (24767)
- 19 outcome assessment\*.mp. [mp=title, abstract, original title, name of substance word, subject heading word, keyword heading word, protocol supplementary concept word, rare disease supplementary concept word, unique identifier, synonyms] (67872)
- 20 outcome measure\*.mp. [mp=title, abstract, original title, name of substance word, subject heading word, keyword heading word, protocol supplementary concept word, rare disease supplementary concept word, unique identifier, synonyms] (169480)
- 21 exp Health Status/ (275273)
- 22 exp "Quality of Life"/ (154742)
- 23 Health Impact Assessment/ (388)
- 24 (well-being or wellbeing or "well being").mp. [mp=title, abstract, original title, name of substance word, subject heading word, keyword heading word, protocol supplementary concept word, rare disease supplementary concept word, unique identifier, synonyms] (55554)
- 25 (health\* or wellness or mental health or mental\* ill\* or mental disorder\* or quality of life or anxiet\* or anxious\* or depress\* or stress\* or dementia or cardiovascular or myocardial infarction\* or heart attack\* or stroke\* or obesity or obese or overweight or learning disabilit\* or learning disorder\* or outcome\*).m\_titl. (1454724)
- 26 exp Mental Health/ (29216)
- 27 exp Mental Disorders/ (1108313)
- 28 exp Depression/ (97090)
- 29 Anxiety/ (67031)
- 30 Stress, Psychological/ (104840)
- 31 exp Dementia/ (141332)
- 32 exp Cardiovascular Diseases/ (2171727)
- 33 Myocardial Infarction/ (159184)
- 34 exp Stroke/ (108360)
- 35 exp Obesity/ (176865)
- 36 exp Learning Disorders/ (22851)
- 37 or/16-36 (5055713)
- 38 exp Empirical Research/ (37340)
- 39 exp Research Design/ (398278)
- 40 exp Qualitative Research/ (33967)
- 41 exp epidemiologic studies/ (2076068)
- 42 or/38-41 (2437850)
- 43 15 and 37 and 42 (525)
- 44 15 and 37 (3842)
- 45 limit 44 to (meta analysis or "review" or systematic reviews) (497)
- 46 limit 44 to "reviews (maximizes sensitivity)" (1175)
- 47 43 or 45 or 46 (1476)

- 48 (review or synthesis or trial or meta-analysis or evaluation or cohort study or case control or survey or qualitative or research).m\_titl. (1399375)
- 49 15 and 37 and 48 (284)
- 50 47 or 49 (1594)
- 51 limit 50 to (english language and yr="1990 -Current") (1460)

Strategies for remaining databases available on request
